# Supplementary material for: Taking the place of perylene diimide: perylene tetracarboxylic tetraester as a building block for polymeric acceptors to achieve higher open circuit voltage in all-polymer bulk heterojunction solar cells
Source: Royal Society of Chemistry journal article supplement (doi:10.1039/c3py00938f), 2013-01-01
Supplement: c3py00938f.pdf [file c3py00938f.pdf]

# Taking the Place of Perylene Diimide: Perylene Tetracarboxylic Tetraester as Building Block for Polymeric Acceptor to Achieve Higher Open Circuit Voltage in All-Polymer Bulk Heterojunction Solar Cells

*Yoyu Jiang,<sup>a,b</sup> Luhua Lu,<sup>a,b</sup> Mingyan Yang,<sup>a</sup> Chun Zhan,<sup>a</sup> Zhizhong Xie,<sup>d</sup> Francis  
Verpoort,<sup>a,c,d</sup> Shengqiang Xiao\*<sup>a,b,c</sup>*

<sup>a</sup> Advanced Technology for Materials Synthesis and Processing, Wuhan University of Technology, Wuhan 430070, P. R. China. Fax: 86 27 87879468; Tel: 86 27 87870537.

E-mail: shengqiang@whut.edu.cn

<sup>b</sup> WUT-USG Joint Laboratory of Advanced Optoelectronic Materials and Devices, State Key Laboratory of Advanced Technology for Materials Synthesis and Processing, Wuhan University of Technology, P. R. China and Institute of Photonics, University of Strathclyde, Glasgow, U.K.

<sup>c</sup> Center for Chemical and Material Engineering, Wuhan University of Technology, Wuhan 430070, P. R. China.

<sup>d</sup> Department of Applied Chemistry, School of Science, Wuhan University of Technology, Wuhan, 430070, P. R. China

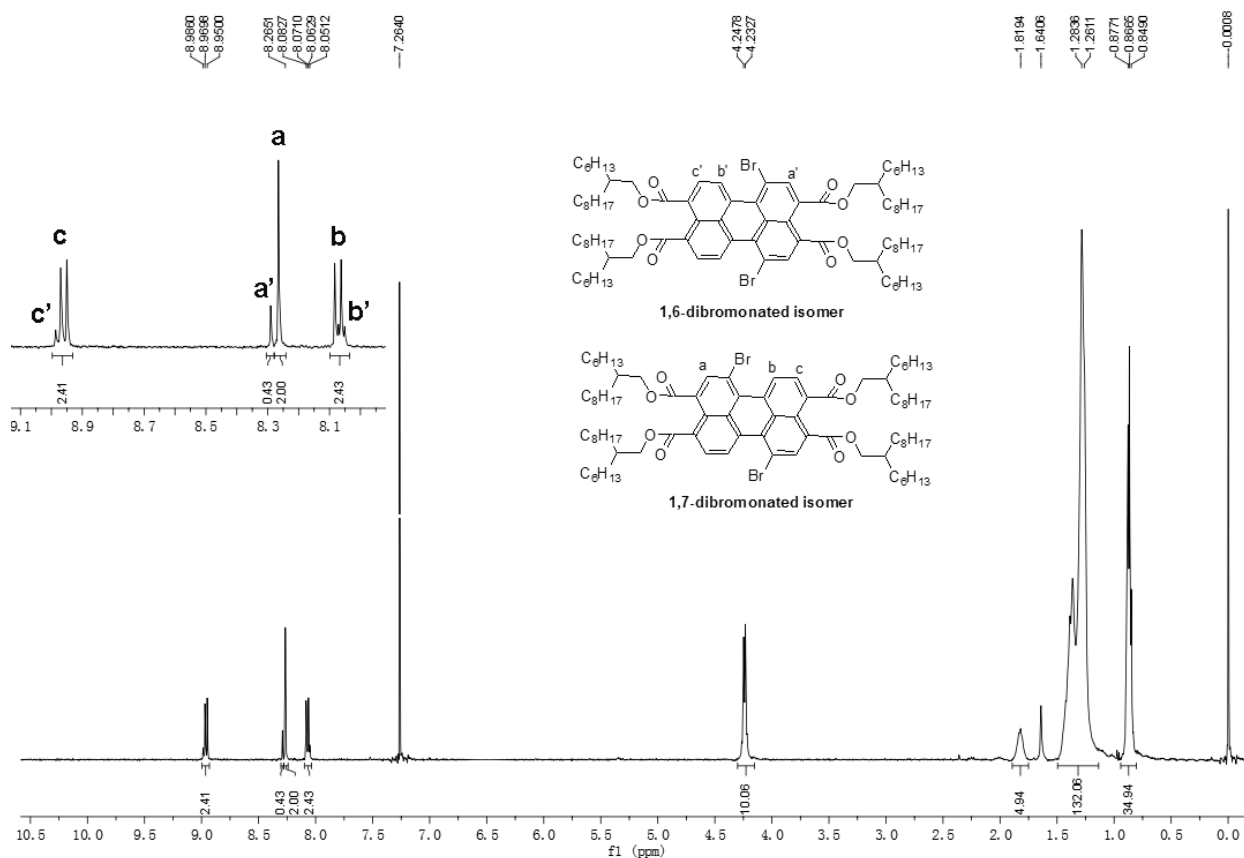

**Figure S1 a.** <sup>1</sup>H NMR spectrum of 1, 7-dibromo-perylene-3,4,9,10-tetracarboxylic tetra(2-hexyldecanyl)ester (compound **2**) containing around 0.22 equiv. of 1, 7-dibromo-perylene-3,4,9,10-tetracarboxylic tetra(2-hexyldecanyl)ester as indicated in the inset.

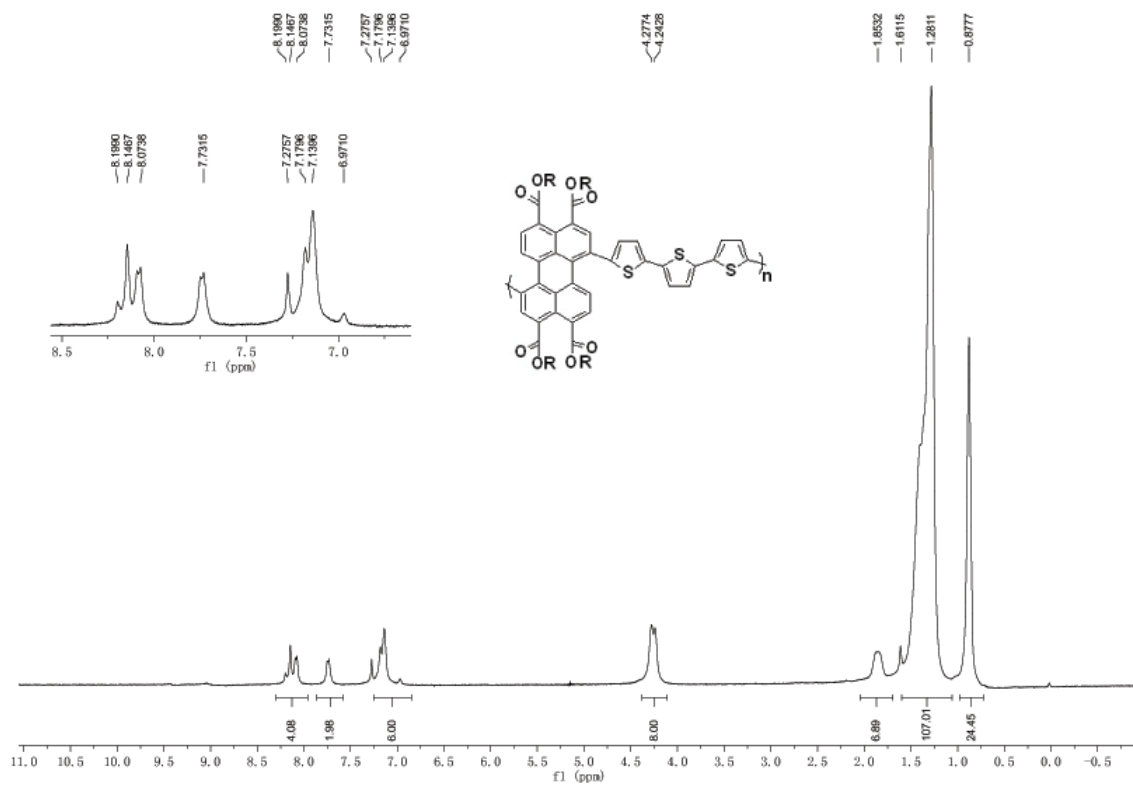

**Figure S1 b.** <sup>1</sup>H NMR spectrum of copolymer PPTTE-TerT.

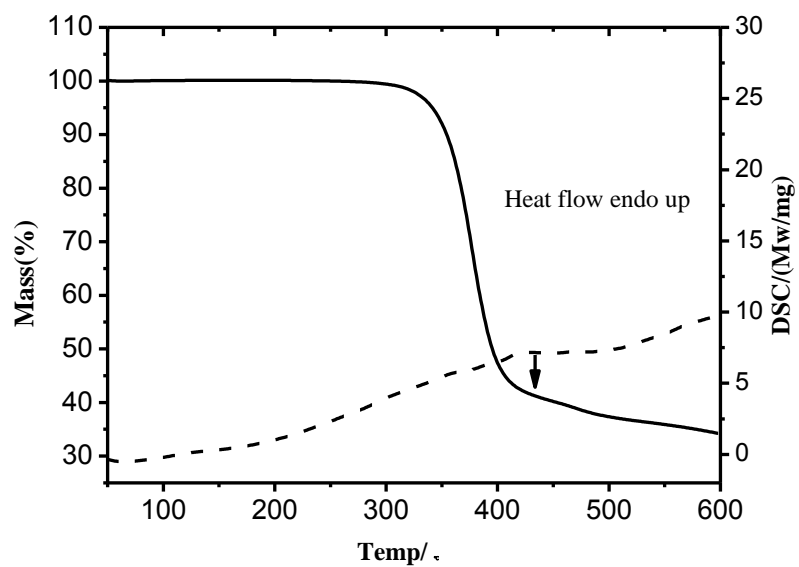

**Figure S2.** TGA-DSC curves of PPTTE-TerT at a heating rate of  $10\text{ °C min}^{-1}$  under nitrogen flow.

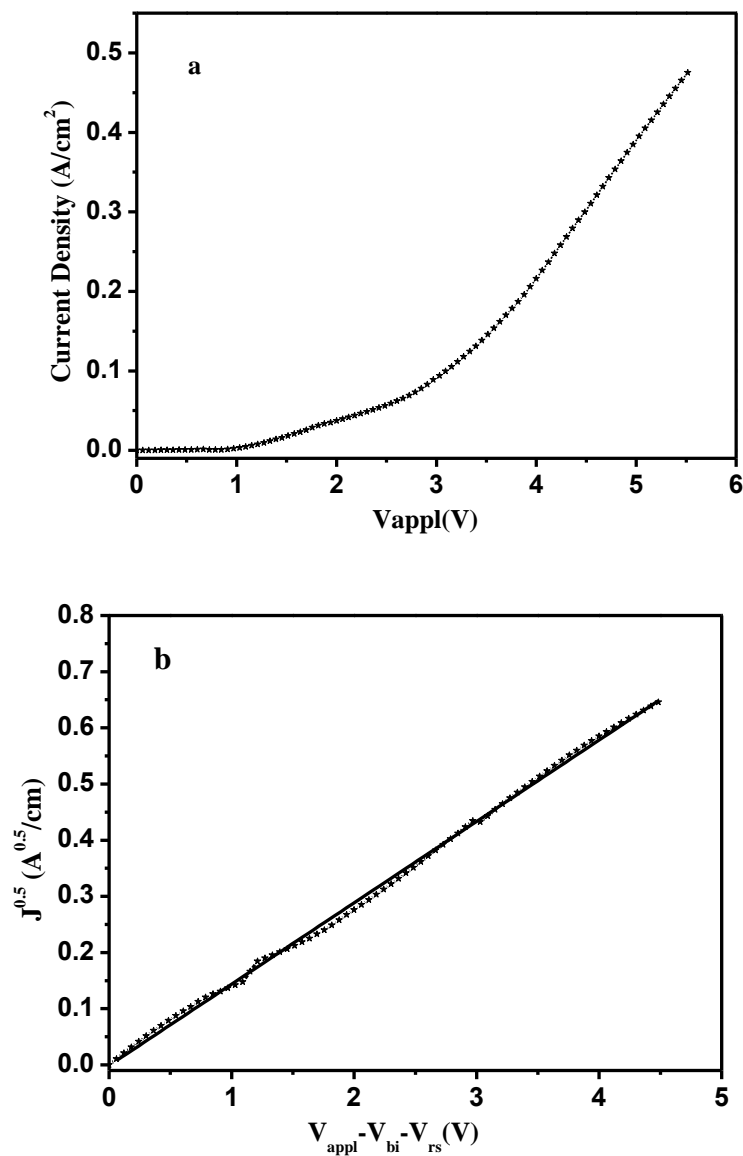

**Figure S3.** (a)  $J$  vs  $V_{appl}$  and (b)  $J^{0.5}$  vs  $V = V_{appl} - V_{bi} - V_{rs}$  plots for pristine film with electron-only device structure of ITO/PEDOT: PSS (45 nm)/ PPTTE-TerT (125nm)/Ca (20nm)/Al (80 nm) for hole-only devices.

**Table S1.** Photovoltaic properties of BHJ films of P3HT: PPTTE-TerT blends with different film thickness from solutions at various D: A ratio.

| Weight ratio<br>D: A | Thickness<br>(nm) | V <sub>oc</sub><br>(V) | J <sub>sc</sub><br>(mA·cm <sup>-2</sup> ) | FF   | PCE<br>(%) |
|----------------------|-------------------|------------------------|-------------------------------------------|------|------------|
| 1:0.3                | 100               | 0.85                   | 1.97                                      | 0.30 | 0.49       |
|                      | 84                | 0.83                   | 1.95                                      | 0.33 | 0.53       |
|                      | 73                | 0.58                   | 0.77                                      | 0.32 | 0.14       |
| 1:0.7                | 202               | 0.81                   | 0.99                                      | 0.20 | 0.16       |
|                      | 149               | 0.83                   | 2.74                                      | 0.34 | 0.76       |
|                      | 128               | 0.71                   | 2.31                                      | 0.33 | 0.54       |
| 1:1                  | 200               | 0.86                   | 1.12                                      | 0.35 | 0.33       |
|                      | 165               | 0.85                   | 1.67                                      | 0.31 | 0.45       |
|                      | 108               | 0.74                   | 1.48                                      | 0.36 | 0.39       |

**Table S2.** Diffraction Angles and related d-spacing in pristine and blend films from XRD spectra

|                                       | 2 $\theta$ (deg) | d[100]-spacing (Å) |
|---------------------------------------|------------------|--------------------|
| P3HT                                  | 5.40             | 16.36              |
| PPTTE-TerT                            | --               | --                 |
| P3HT: PPTTE-TerT =1:0.3(weight ratio) | 5.48             | 16.12              |
| P3HT: PPTTE-TerT =1:0.7(weight ratio) | 5.39             | 16.38              |
| P3HT: PPTTE-TerT =1:1(weight ratio)   | 5.38             | 16.40              |

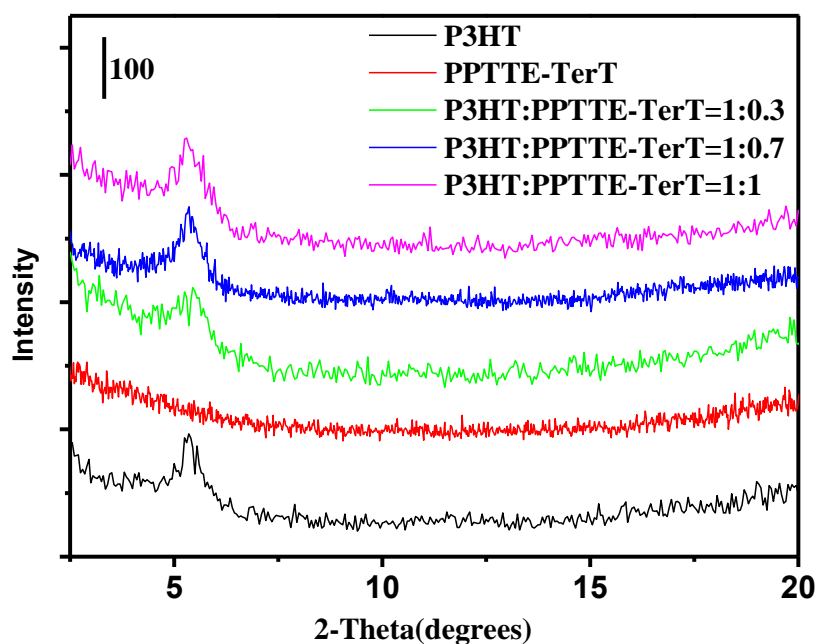

**Figure S4.** Out of plane GIXRD profiles of pristine and blend films of PPTTE-TerT and P3HT on the quartz glass substrate.
